# Supplementary material for: DPP8 is a novel therapeutic target for multiple myeloma
Source: PubMed Central journal article supplement (PMC6889119; doi:10.1038/s41598-019-54695-w), 2019-12-02
Supplement: 41598_2019_54695_MOESM1_ESM.pdf [file 41598_2019_54695_MOESM1_ESM.pdf]

**Title**

DPP8 is a novel therapeutic target for multiple myeloma

**Authors and affiliations**

Tsutomu Sato<sup>1</sup>, Ayumi Tatekoshi<sup>2</sup>, Kohichi Takada<sup>2</sup>, Satoshi Iyama<sup>2</sup>, Yusuke Kamihara<sup>3</sup>, Paras Jawaid<sup>4</sup>, Mati Ur Rehman<sup>4</sup>, Kyo Noguchi<sup>4</sup>, Takashi Kondo<sup>4</sup>, Sayaka Kajikawa<sup>1</sup>, Kotaro Arita<sup>1</sup>, Akinori Wada<sup>1</sup>, Jun Murakami<sup>1</sup>, Miho Arai<sup>5</sup>, Ichiro Yasuda<sup>6</sup>, Nam H. Dang<sup>7</sup>, Ryo Hatano<sup>8</sup>, Noriaki Iwao<sup>8</sup>, Kei Ohnuma<sup>8</sup>, and Chikao Morimoto<sup>8</sup>

<sup>1</sup>Department of Hematology, Toyama University Hospital, Toyama, Japan

<sup>2</sup>Department of Medical Oncology and Hematology, Sapporo Medical University, Sapporo, Japan

<sup>3</sup>Department of Hematology, National Cancer Center Hospital East, Kashiwa, Japan

<sup>4</sup>Department of Radiology, University of Toyama, Toyama, Japan

<sup>5</sup>Department of Pediatrics, University of Toyama, Toyama, Japan

<sup>6</sup>Department of Gastroenterology and Hematology, University of Toyama, Toyama, Japan

<sup>7</sup>Division of Hematology/Oncology, University of Florida, Gainesville, Florida, USA

<sup>8</sup>Department of Therapy Development and Innovation for Immune Disorders and Cancers, Juntendo University, Tokyo, Japan

**A**

● Karpas 299

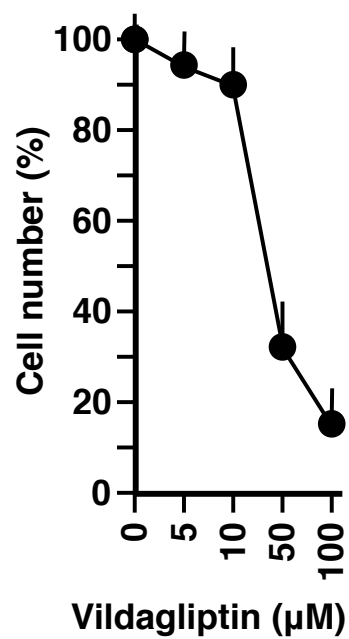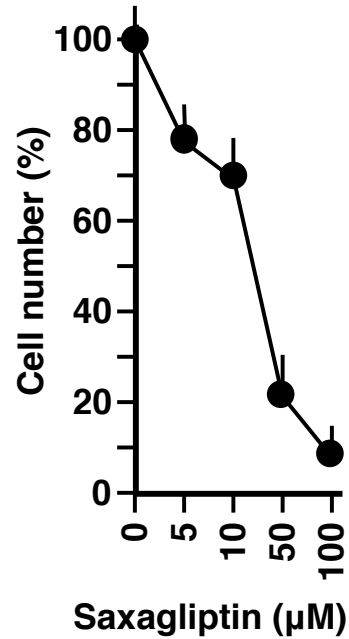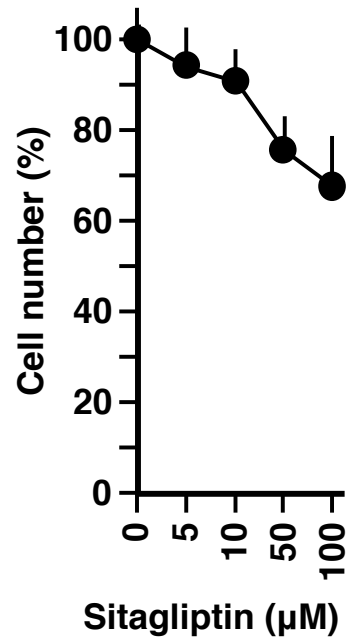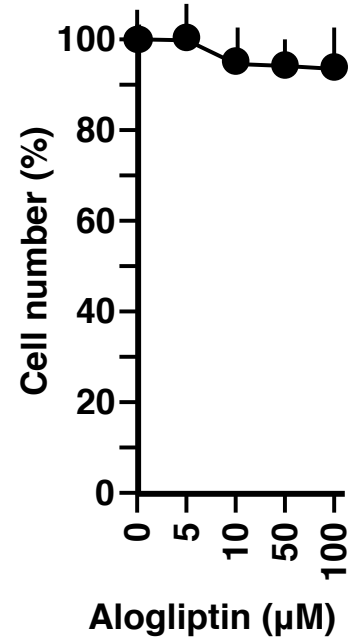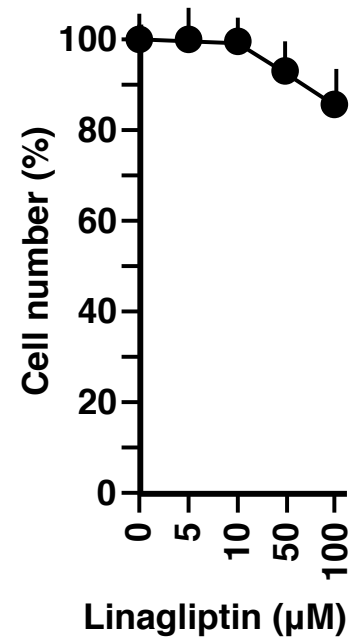**B**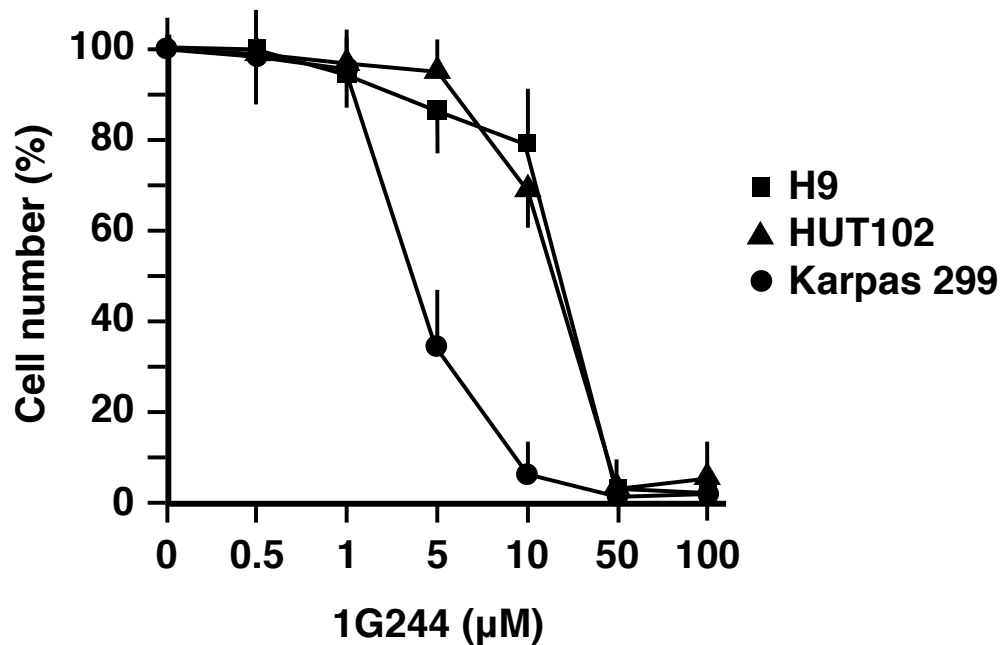

**Patient 1**

**Patient 2**

**Before Isolation**

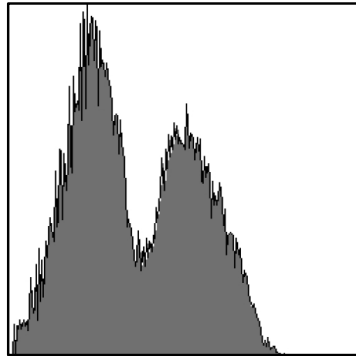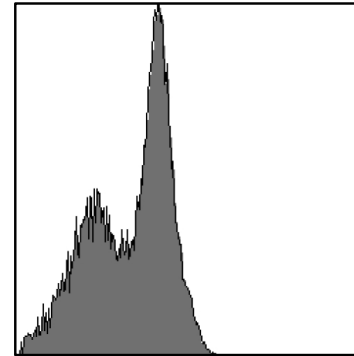

**After Isolation**

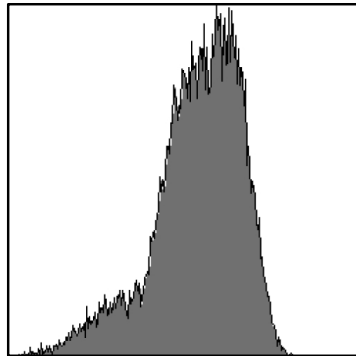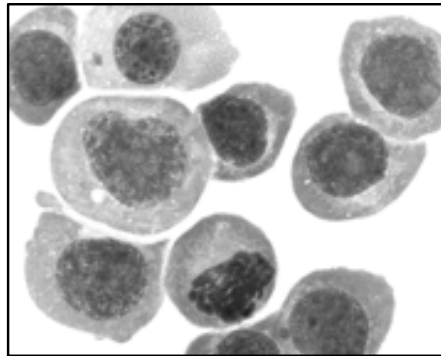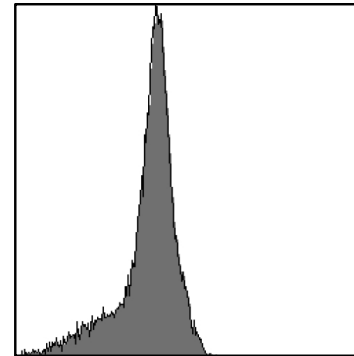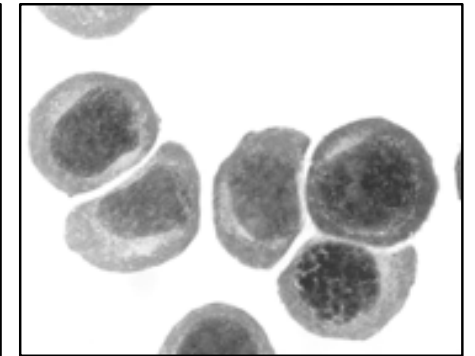

**CD138**

**MG staining**

**CD138**

**MG staining**

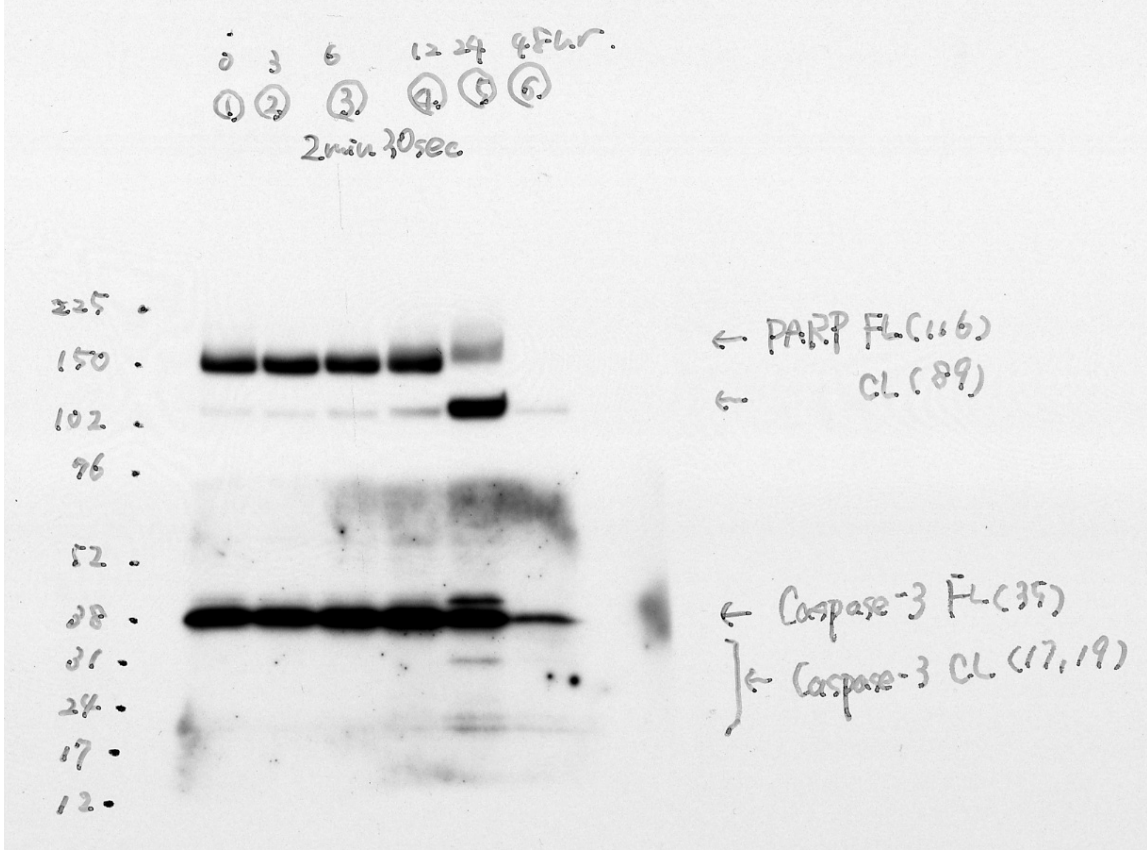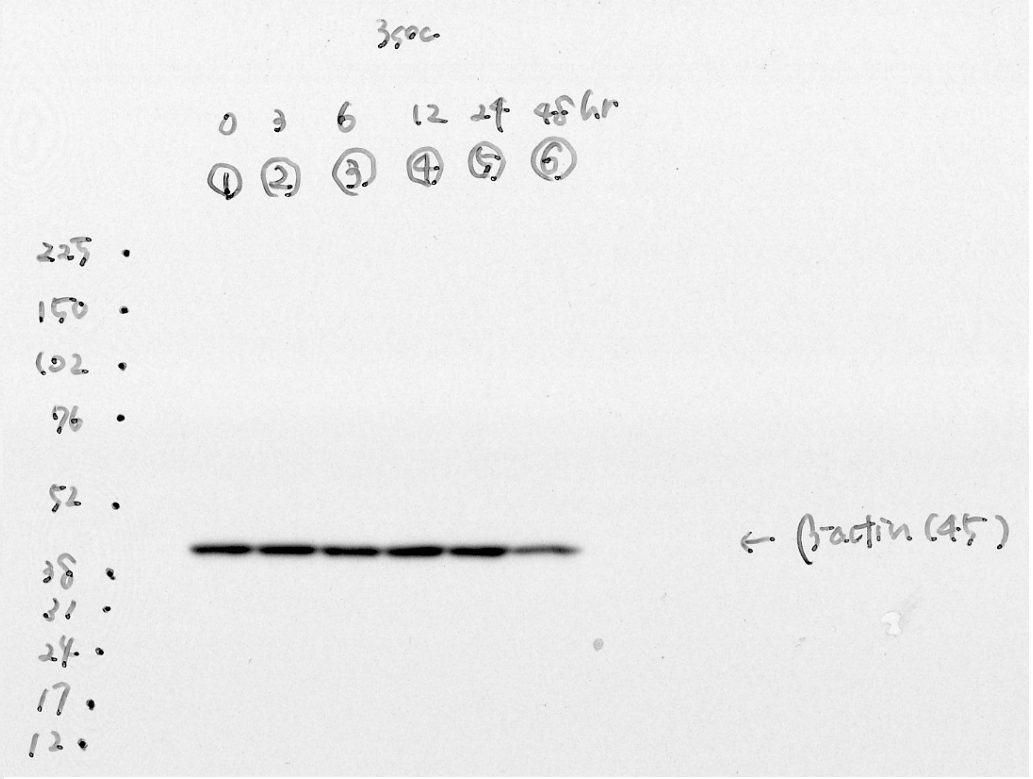

Supplementary Fig. 3

## **Supplementary Figure Legend**

### **Supplementary Fig. 1 Cytotoxic effects of DPP8/9 inhibitor against T-cell lymphoma cell lines**

(A)  $1.0 \times 10^5$  Karpas 299 (open circles) cells were cultured with 0-100  $\mu\text{M}$  DPP4 inhibitors (vildagliptin, saxagliptin, sitagliptin, alogliptin, or linagliptin) for 72 hours. Cell number was estimated by a colorimetric assay using WST-1 reagent (n=6).

(B)  $1.0 \times 10^5$  H9 (squares), HUT102 (triangles), or Karpas 299 (circles) cells were cultured with 1G244 (0-100  $\mu\text{M}$ ) for 72 hours. Cell number was estimated by a colorimetric assay using WST-1 reagent (n=6).

### **Supplementary Fig. 2 Myeloma cells from patients**

CD138-positive myeloma cells were isolated from bone marrow cells using magnetic beads. The expression of CD138 was analyzed flow cytometrically before and after isolation. The isolated cells were stained with May-Giemsa method. As the typical example, the data of patient 1 and 2 are presented.

### **Supplementary Fig. 3 Original uncropped full-length images of the western blots shown in Fig. 3C**
